# Supplementary material
Source: MDPI journal article supplement (https://www.mdpi.com/2227-9040/8/4/108)
Supplement: s1 [file s1]

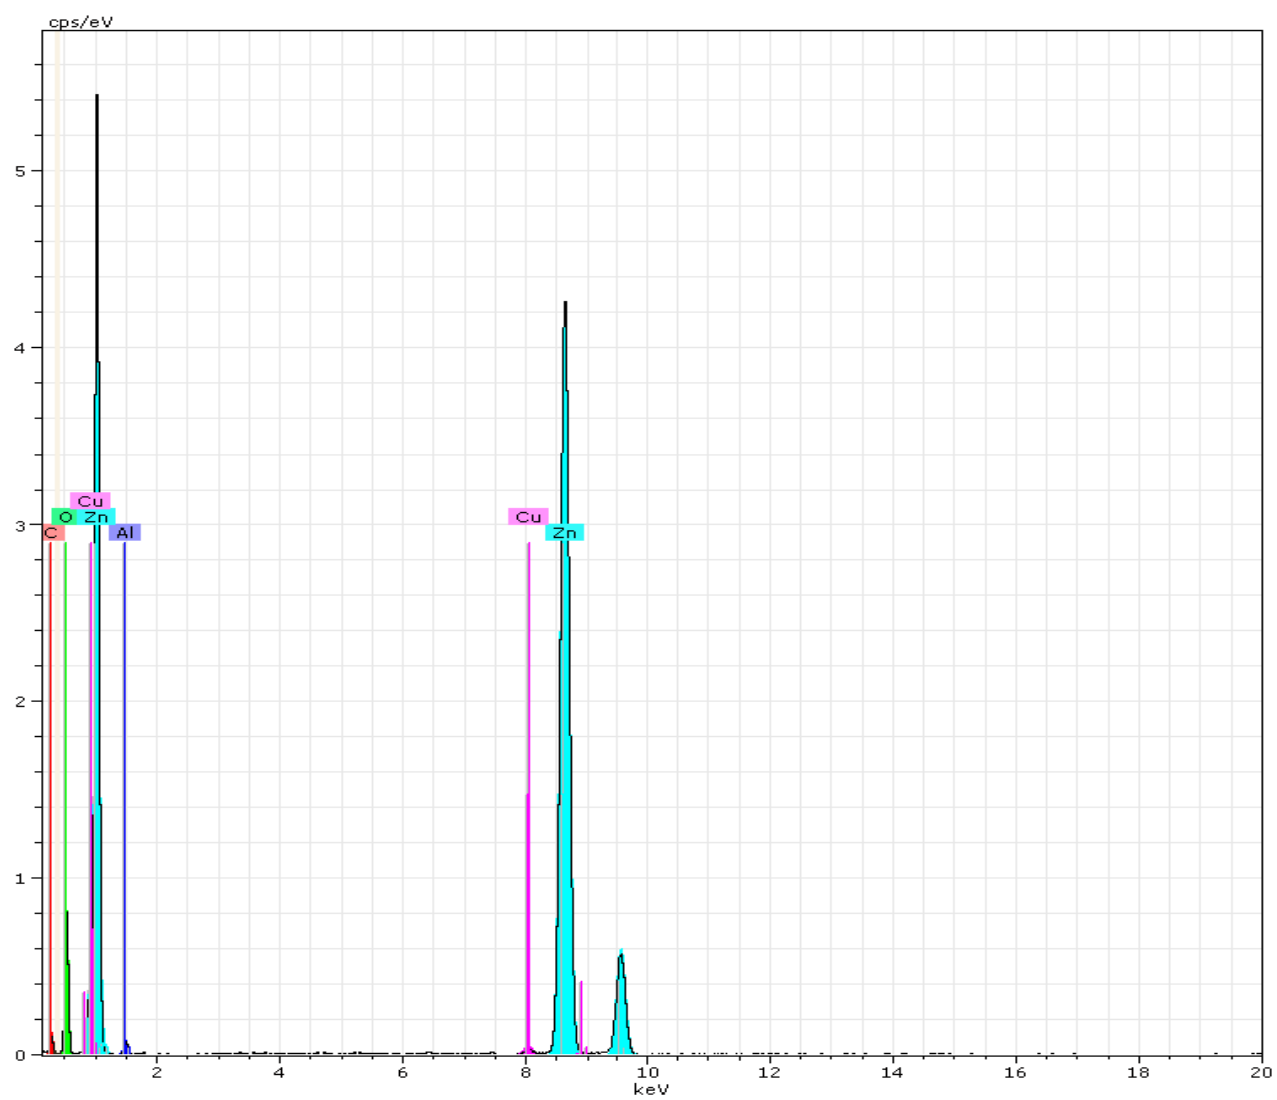

**Figure S1.** EDS of pure ZnO nanoparticle.

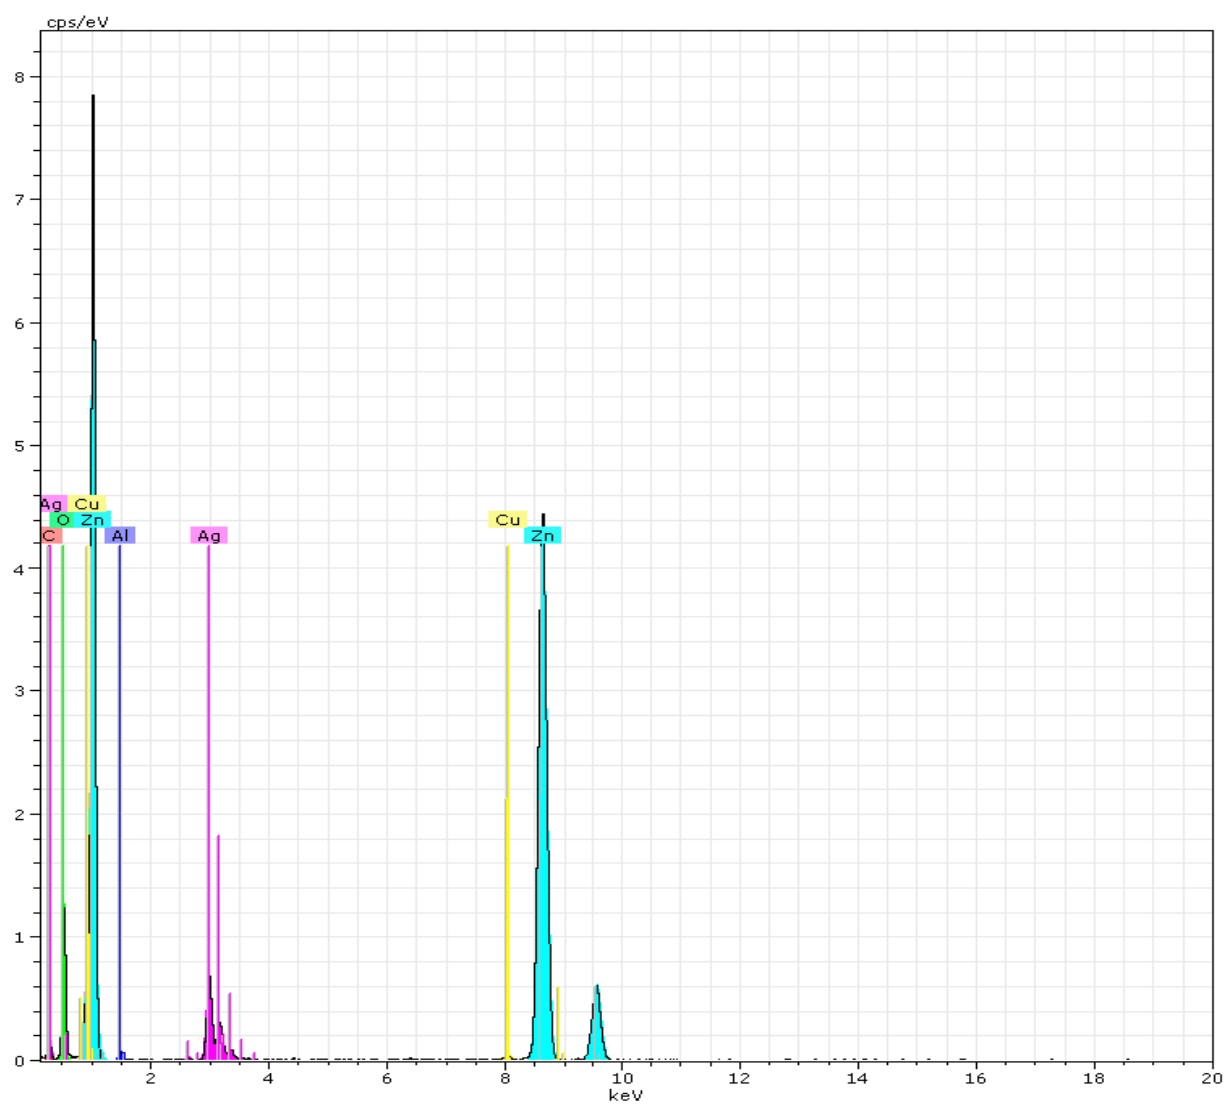

**Figure S2.** EDS of 1 % Ag-ZnO nanoparticle.

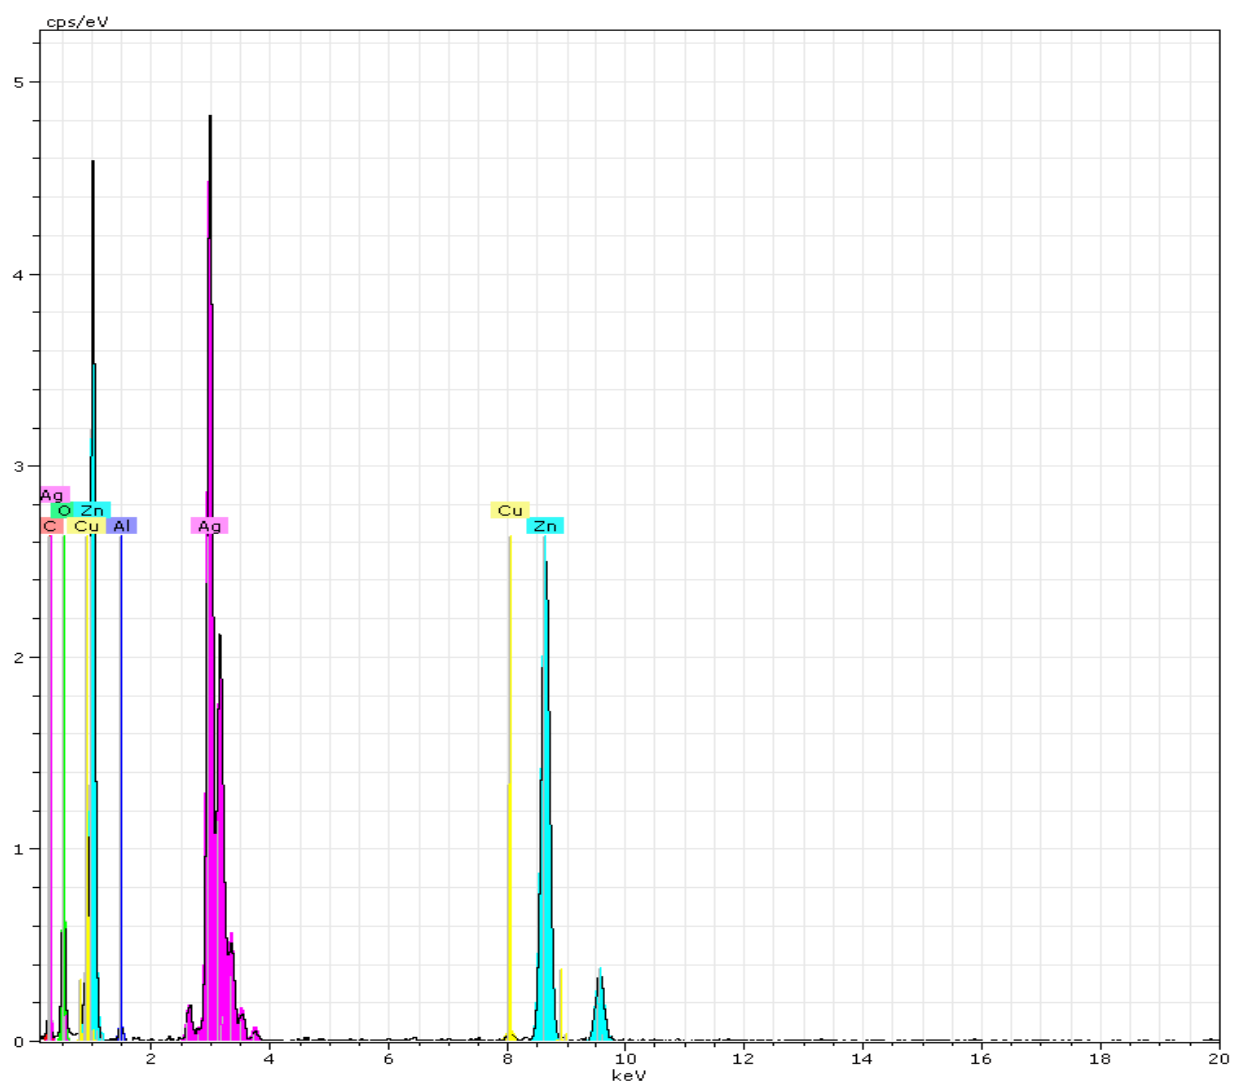

**Figure S3.** EDS of 5 % Ag-ZnO nanoparticle.

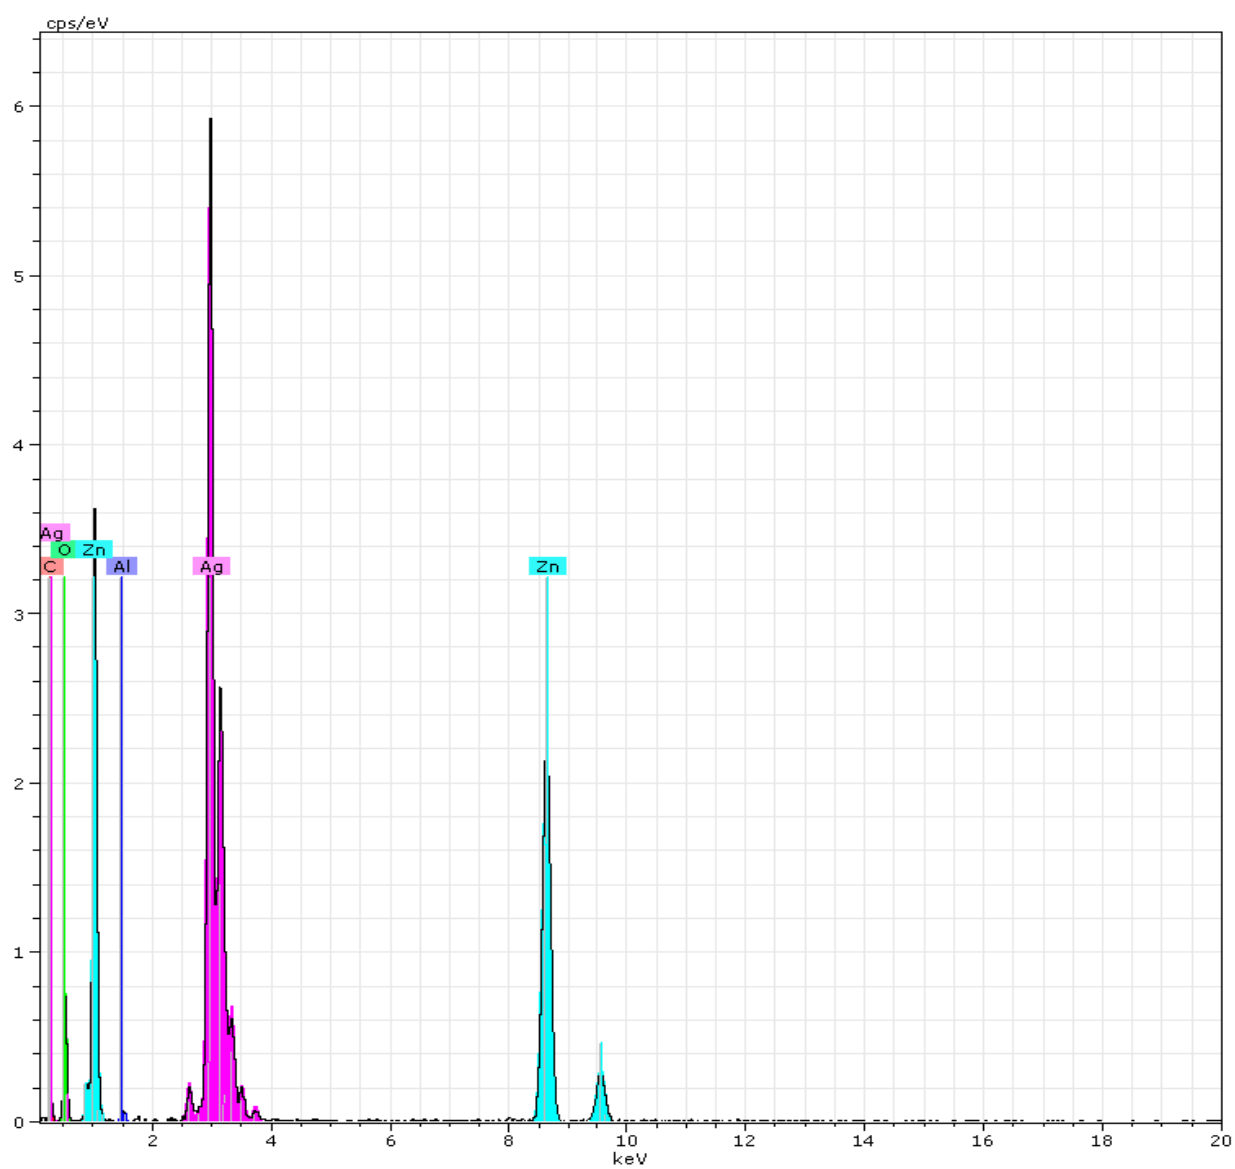

**Figure S4.** EDS of 10 % Ag-ZnO nanoparticle.

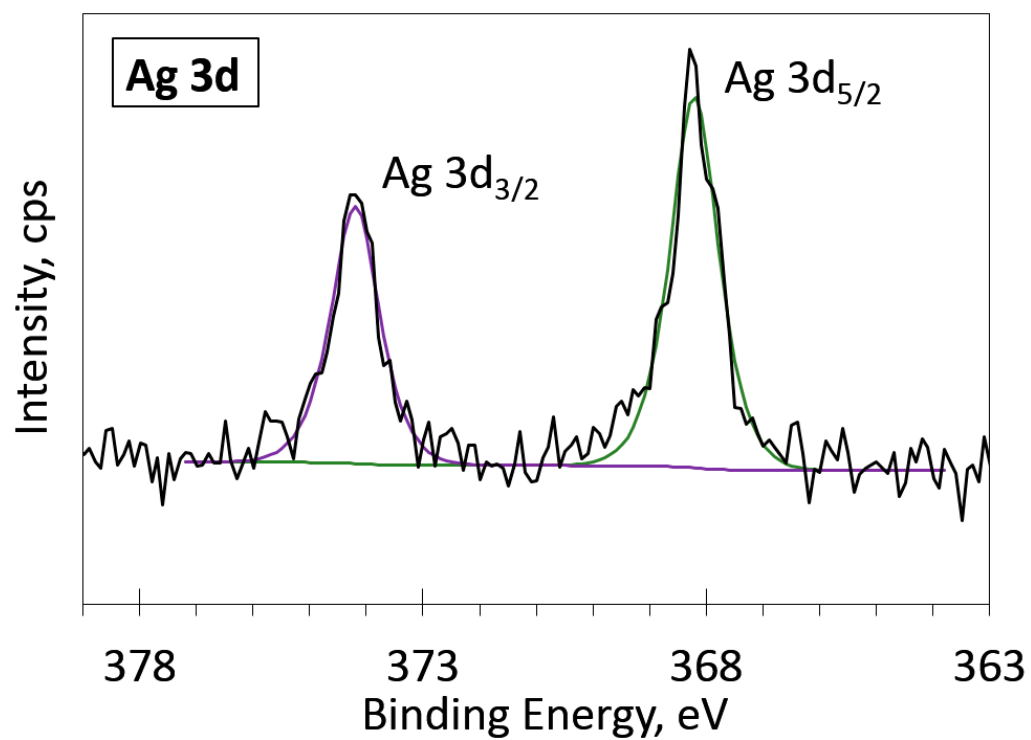

**Figure S5.** Deconvoluted high-resolution XPS spectra for 1% Ag-ZnO powder sample. Black curve - acquired data, dark green curve – fitted Ag 3d<sub>5/2</sub> peak, violet curve - fitted Ag 3d<sub>3/2</sub> peak.
